# Supplementary material for: Effect of Embryo Density on In Vitro Development and Gene Expression in Bovine In Vitro-fertilized Embryos Cultured in a Microwell System
Source: PubMed Central journal article supplement — J Reprod Dev. 2012 Nov 15;59(2):115–22. doi: 10.1262/jrd.2012-113 (PMC3934200; doi:10.1262/jrd.2012-113), 2012-11-15
Supplement: jrd-59-115-s001.pdf [file jrd-59-115-s001.pdf]

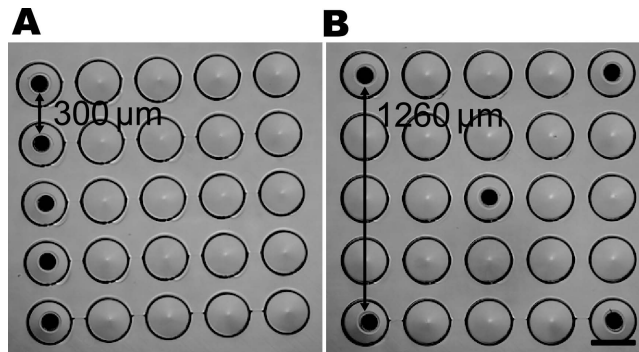

**Supplementary Fig. 1.** Illustration of the distances between embryos in WOW dishes for *in vitro* culture of bovine IVF embryos. **A** and **B** have embryo distances of 300 and 1260  $\mu\text{m}$ , respectively. Bar = 300  $\mu\text{m}$ .
