# Supplementary material for: Effect of Embryo Density on In Vitro Development and Gene Expression in Bovine In Vitro-fertilized Embryos Cultured in a Microwell System
Source: PubMed Central journal article supplement — J Reprod Dev. 2012 Nov 15;59(2):115–22. doi: 10.1262/jrd.2012-113 (PMC3934200; doi:10.1262/jrd.2012-113), 2012-11-15
Supplement: jrd-59-115-s002.pdf [file jrd-59-115-s002.pdf]

**Supplementary Table 1.** Effect of distance between embryos on bovine embryo development in WOW culture dishes

| Distance<br>between<br>embryos ( $\mu\text{m}$ ) | Total cultured<br>embryos<br>(replicate<br>dishes) | Number of embryos (%) <sup>a</sup> |                     |                     |                    |
|--------------------------------------------------|----------------------------------------------------|------------------------------------|---------------------|---------------------|--------------------|
|                                                  |                                                    | Cleavage stage                     |                     | Blastocyst stage    |                    |
|                                                  |                                                    | Total                              | >4-cell             | Total               | Expanded           |
| 300                                              | 25 (5)                                             | 23 (92.0 $\pm$ 4.9)                | 17 (68.0 $\pm$ 4.9) | 11 (44.0 $\pm$ 7.5) | 8 (32.0 $\pm$ 4.9) |
| 1260                                             | 25 (5)                                             | 22 (88.0 $\pm$ 4.9)                | 16 (64.0 $\pm$ 7.5) | 12 (48.0 $\pm$ 8.0) | 7 (28.0 $\pm$ 4.9) |

<sup>a</sup>Percent values indicate the mean  $\pm$  SEM.
